# Supplementary material for: Comparing g-computation, propensity score-based weighting, and targeted maximum likelihood estimation for analyzing externally controlled trials with both measured and unmeasured confounders: a simulation study
Source: Springer Nature journal article supplement (doi:10.1186/s12874-023-01835-6), 2023-01-16
Supplement: MOESM1 [file 23929606]

**Supplementary file S1: Performance of different methods for estimating the treatment effects (n=100)**

| Outcome<br>/Method              | Scenario 1 (small and blocked confounding paths) |       |          |       | Scenario 2 (medium and blocked confounding paths) |       |          |       | Scenario 3 (one large unblocked confounding path) |       |          |       |
|---------------------------------|--------------------------------------------------|-------|----------|-------|---------------------------------------------------|-------|----------|-------|---------------------------------------------------|-------|----------|-------|
|                                 | Bias                                             | RMSE  | Coverage | Width | Bias                                              | RMSE  | Coverage | Width | Bias                                              | RMSE  | Coverage | Width |
| <b>Outcome <math>Y_a</math></b> |                                                  |       |          |       |                                                   |       |          |       |                                                   |       |          |       |
| Raw                             | -0.807                                           | 0.913 | 0.545    | 1.711 | -1.116                                            | 1.235 | 0.437    | 2.029 | -1.482                                            | 1.564 | 0.168    | 1.978 |
| GC                              | -0.011                                           | 0.499 | 0.950    | 1.968 | 0.001                                             | 0.605 | 0.934    | 2.301 | -0.456                                            | 0.747 | 0.862    | 2.296 |
| PS_IPTW                         | -0.105                                           | 0.628 | 0.828    | 1.678 | -0.176                                            | 0.739 | 0.824    | 1.997 | -0.645                                            | 0.955 | 0.665    | 1.950 |
| PS_OW                           | -0.016                                           | 0.508 | 0.894    | 1.642 | -0.002                                            | 0.617 | 0.883    | 1.950 | -0.476                                            | 0.767 | 0.776    | 1.910 |
| PS_SMR                          | -0.097                                           | 0.701 | 0.776    | 1.642 | -0.166                                            | 0.817 | 0.773    | 1.954 | -0.666                                            | 1.094 | 0.604    | 1.919 |
| TMLE                            | -0.064                                           | 0.601 | 0.905    | 2.009 | -0.088                                            | 0.709 | 0.886    | 2.268 | -0.568                                            | 0.896 | 0.769    | 2.259 |
| <b>Outcome <math>Y_b</math></b> |                                                  |       |          |       |                                                   |       |          |       |                                                   |       |          |       |
| Raw                             | -0.259                                           | 0.514 | 0.899    | 1.737 | -0.329                                            | 0.545 | 0.874    | 1.688 | -0.434                                            | 0.605 | 0.819    | 1.658 |
| GC                              | 0.023                                            | 0.513 | 0.931    | 2.031 | 0.020                                             | 0.505 | 0.920    | 1.936 | -0.128                                            | 0.515 | 0.923    | 1.931 |
| PS_IPTW                         | 0.041                                            | 0.636 | 0.855    | 1.767 | 0.015                                             | 0.620 | 0.851    | 1.728 | -0.176                                            | 0.646 | 0.816    | 1.696 |
| PS_OW                           | 0.061                                            | 0.561 | 0.887    | 1.747 | 0.063                                             | 0.557 | 0.889    | 1.717 | -0.110                                            | 0.550 | 0.877    | 1.689 |
| PS_SMR                          | 0.008                                            | 0.713 | 0.796    | 1.737 | -0.028                                            | 0.730 | 0.776    | 1.717 | -0.215                                            | 0.796 | 0.728    | 1.700 |
| TMLE                            | 0.039                                            | 0.618 | 0.973    | 2.753 | 0.024                                             | 0.608 | 0.975    | 2.722 | -0.168                                            | 0.628 | 0.965    | 2.695 |
| <b>Outcome <math>Y_c</math></b> |                                                  |       |          |       |                                                   |       |          |       |                                                   |       |          |       |
| Raw                             | 0.170                                            | 0.297 | 0.892    | 0.952 | 0.203                                             | 0.317 | 0.848    | 0.942 | 0.240                                             | 0.343 | 0.801    | 0.931 |
| GC                              | -0.011                                           | 0.272 | 0.926    | 1.057 | -0.011                                            | 0.276 | 0.922    | 1.062 | 0.048                                             | 0.288 | 0.924    | 0.061 |
| PS_IPTW                         | 0.011                                            | 0.340 | 0.919    | 1.170 | 0.011                                             | 0.338 | 0.923    | 1.171 | 0.065                                             | 0.343 | 0.905    | 0.152 |
| PS_OW                           | -0.040                                           | 0.305 | 0.939    | 1.135 | -0.042                                            | 0.310 | 0.940    | 1.150 | 0.019                                             | 0.315 | 0.930    | 0.145 |
| PS_SMR                          | -0.016                                           | 0.327 | 0.923    | 1.138 | -0.022                                            | 0.338 | 0.919    | 1.149 | 0.051                                             | 0.358 | 0.901    | 0.154 |
| TMLE                            | 0.130                                            | 0.419 | 0.920    | 1.749 | 0.131                                             | 0.398 | 0.934    | 1.711 | 0.180                                             | 0.410 | 0.924    | 0.654 |

GC, g-computation; RMSE, root mean squared error; PS-, propensity score-based; IPTW, inverse probability of treatment weighting; SMR, standardized mortality or morbidity ratio; OW, overlap weighting; TMLE, targeted maximum likelihood estimation. Bias was the average difference between the true value (simulated) and its estimate across the simulation replicates. RMSE was the square root of the mean squared error (MSE) that is the average squared difference between the true value and its estimate across the simulation replicates. Coverage was the proportion of times the 95% confidence interval of the estimate contained the true value. Width was the average difference between the upper and lower bounds of 95% confidence interval of estimate.
