# Supplementary material for: Comparing g-computation, propensity score-based weighting, and targeted maximum likelihood estimation for analyzing externally controlled trials with both measured and unmeasured confounders: a simulation study
Source: Springer Nature journal article supplement (doi:10.1186/s12874-023-01835-6), 2023-01-16
Supplement: MOESM2 [file 23929606]

## Supplementary file S2.

In this sensitivity analysis, we changed the magnitude of treatment effect (A) for the binary outcome ( $Y_b$ ) in Scenario 3 (one large unblocked confounding path) through setting a different coefficient in the following formulars. The true odds ratio was ranged from 0.55 to 3.10 (-0.60 to 1.13 in log scale).

- Sensitivity 1 (true odds ratio = 3.10):  $\text{logit}(Y_b) = 2.5 - 0.05 * C - 1 * U + 2 * A + e$
- Sensitivity 2 (true odds ratio = 1.03):  $\text{logit}(Y_b) = 2.5 - 0.05 * C - 1 * U + 0 * A + e$
- Sensitivity 3 (true odds ratio = 0.55):  $\text{logit}(Y_b) = 2.5 - 0.05 * C - 1 * U - 1 * A + e$

### Performance of different methods for estimating the treatment effects of binary outcome in scenario 3 (n=200)

| Treatment effect for $Y_b$<br>/Method | Scenario 3 (one large unblocked confounding path) |       |          |       |
|---------------------------------------|---------------------------------------------------|-------|----------|-------|
|                                       | Bias                                              | RMSE  | Coverage | Width |
| <b>Log(odds ratio) = 1.13</b>         |                                                   |       |          |       |
| Raw                                   | -0.459                                            | 0.545 | 0.652    | 1.156 |
| GC                                    | -0.147                                            | 0.375 | 0.940    | 1.386 |
| PS_IPTW                               | -0.171                                            | 0.465 | 0.811    | 1.177 |
| PS_OW                                 | -0.140                                            | 0.392 | 0.863    | 1.173 |
| PS_SMR                                | -0.204                                            | 0.564 | 0.711    | 1.170 |
| TMLE                                  | -0.160                                            | 0.453 | 0.963    | 1.867 |
| <b>Log(odds ratio) = 0.03</b>         |                                                   |       |          |       |
| Raw                                   | -0.489                                            | 0.568 | 0.623    | 1.150 |
| GC                                    | -0.185                                            | 0.394 | 0.925    | 1.391 |
| PS_IPTW                               | -0.197                                            | 0.478 | 0.774    | 1.144 |
| PS_OW                                 | -0.184                                            | 0.405 | 0.845    | 1.138 |
| PS_SMR                                | -0.167                                            | 0.544 | 0.726    | 1.169 |
| TMLE                                  | -0.182                                            | 0.461 | 0.962    | 1.859 |
| <b>Log(odds ratio) = -0.60</b>        |                                                   |       |          |       |
| Raw                                   | -0.492                                            | 0.584 | 0.661    | 1.236 |
| GC                                    | -0.176                                            | 0.415 | 0.940    | 1.505 |
| PS_IPTW                               | -0.251                                            | 0.522 | 0.758    | 1.215 |
| PS_OW                                 | -0.185                                            | 0.428 | 0.846    | 1.201 |
| PS_SMR                                | -0.208                                            | 0.572 | 0.736    | 1.243 |
| TMLE                                  | -0.232                                            | 0.511 | 0.966    | 2.018 |

GC, g-computation; RMSE, root mean squared error; PS-, propensity score-based; IPTW, inverse probability of treatment weighting; SMR, standardized mortality or morbidity ratio; OW, overlap weighting; TMLE, targeted maximum likelihood estimation. Bias was the average difference between the true value (simulated) and its estimate across the simulation replicates using the log-transformed scale for the binary outcome, such as log(odds ratio). RMSE was the square root of the mean squared error (MSE) that is the average squared difference between the true value and its estimate across the simulation replicates. Coverage was the proportion of times the 95% confidence interval of the estimate contained the true value. Width was the average difference between the upper and lower bounds of 95% confidence interval of estimate.

A similar sensitivity analysis was also conducted in scenario 1 and scenario 2 (see below).

**Performance of different methods for estimating the treatment effects of binary outcome in scenario 1 (n=200)**

| Treatment effect for $Y_b$<br>/Method | Scenario 1 (small and blocked confounding paths) |       |          |       |
|---------------------------------------|--------------------------------------------------|-------|----------|-------|
|                                       | Bias                                             | RMSE  | Coverage | Width |
| <b>Log(odds ratio) = 1.18</b>         |                                                  |       |          |       |
| Raw                                   | -0.249                                           | 0.394 | 0.864    | 1.207 |
| GC                                    | 0.035                                            | 0.363 | 0.952    | 1.433 |
| PS_IPTW                               | 0.040                                            | 0.439 | 0.838    | 1.217 |
| PS_OW                                 | 0.052                                            | 0.389 | 0.884    | 1.206 |
| PS_SMR                                | 0.039                                            | 0.514 | 0.761    | 1.199 |
| TMLE                                  | 0.048                                            | 0.438 | 0.976    | 1.948 |
| <b>Log(odds ratio) = 0.01</b>         |                                                  |       |          |       |
| Raw                                   | -0.257                                           | 0.390 | 0.859    | 1.146 |
| GC                                    | -0.009                                           | 0.356 | 0.942    | 1.381 |
| PS_IPTW                               | -0.017                                           | 0.426 | 0.823    | 1.132 |
| PS_OW                                 | -0.001                                           | 0.368 | 0.875    | 1.128 |
| PS_SMR                                | -0.029                                           | 0.502 | 0.754    | 1.146 |
| TMLE                                  | -0.003                                           | 0.420 | 0.970    | 1.836 |
| <b>Log(odds ratio) = -0.58</b>        |                                                  |       |          |       |
| Raw                                   | -0.279                                           | 0.422 | 0.855    | 1.209 |
| GC                                    | -0.026                                           | 0.372 | 0.949    | 1.460 |
| PS_IPTW                               | -0.074                                           | 0.465 | 0.805    | 1.179 |
| PS_OW                                 | -0.026                                           | 0.383 | 0.884    | 1.172 |
| PS_SMR                                | -0.023                                           | 0.524 | 0.751    | 1.199 |
| TMLE                                  | -0.051                                           | 0.460 | 0.968    | 1.960 |

*GC, g-computation; RMSE, root mean squared error; PS-, propensity score-based; IPTW, inverse probability of treatment weighting; SMR, standardized mortality or morbidity ratio; OW, overlap weighting; TMLE, targeted maximum likelihood estimation. Bias was the average difference between the true value (simulated) and its estimate across the simulation replicates using the log-transformed scale for the binary outcome, such as log(odds ratio). RMSE was the square root of the mean squared error (MSE) that is the average squared difference between the true value and its estimate across the simulation replicates. Coverage was the proportion of times the 95% confidence interval of the estimate contained the true value. Width was the average difference between the upper and lower bounds of 95% confidence interval of estimate.*

**Performance of different methods for estimating the treatment effects of binary outcome in scenario 2 (n=200)**

| Treatment effect for $Y_b$<br>/Method | Scenario 2 (medium and blocked confounding paths) |       |          |       |
|---------------------------------------|---------------------------------------------------|-------|----------|-------|
|                                       | Bias                                              | RMSE  | Coverage | Width |
| <b>Log(odds ratio) = 1.13</b>         |                                                   |       |          |       |
| Raw                                   | -0.318                                            | 0.436 | 0.802    | 1.174 |
| GC                                    | 0.015                                             | 0.348 | 0.951    | 1.382 |
| PS_IPTW                               | -0.005                                            | 0.442 | 0.832    | 1.190 |
| PS_OW                                 | 0.031                                             | 0.374 | 0.887    | 1.185 |
| PS_SMR                                | 0.001                                             | 0.506 | 0.753    | 1.182 |
| TMLE                                  | 0.011                                             | 0.431 | 0.972    | 1.865 |
| <b>Log(odds ratio) = 0.04</b>         |                                                   |       |          |       |
| Raw                                   | -0.343                                            | 0.451 | 0.795    | 1.154 |
| GC                                    | -0.005                                            | 0.348 | 0.946    | 1.377 |
| PS_IPTW                               | -0.008                                            | 0.430 | 0.820    | 1.141 |
| PS_OW                                 | 0.004                                             | 0.362 | 0.886    | 1.138 |
| PS_SMR                                | 0.003                                             | 0.487 | 0.784    | 1.168 |
| TMLE                                  | 0.009                                             | 0.417 | 0.971    | 1.829 |
| <b>Log(odds ratio) = -0.58</b>        |                                                   |       |          |       |
| Raw                                   | -0.345                                            | 0.470 | 0.813    | 1.233 |
| GC                                    | 0.007                                             | 0.376 | 0.949    | 1.478 |
| PS_IPTW                               | -0.068                                            | 0.478 | 0.806    | 1.200 |
| PS_OW                                 | 0.007                                             | 0.387 | 0.878    | 1.190 |
| PS_SMR                                | -0.027                                            | 0.515 | 0.790    | 1.232 |
| TMLE                                  | -0.039                                            | 0.469 | 0.969    | 1.984 |

*GC, g-computation; RMSE, root mean squared error; PS-, propensity score-based; IPTW, inverse probability of treatment weighting; SMR, standardized mortality or morbidity ratio; OW, overlap weighting; TMLE, targeted maximum likelihood estimation. Bias was the average difference between the true value (simulated) and its estimate across the simulation replicates using the log-transformed scale for the binary outcome, such as log(odds ratio). RMSE was the square root of the mean squared error (MSE) that is the average squared difference between the true value and its estimate across the simulation replicates. Coverage was the proportion of times the 95% confidence interval of the estimate contained the true value. Width was the average difference between the upper and lower bounds of 95% confidence interval of estimate.*
